# Supplementary material for: Investigating electrochemical behavior of cobalt pentacyano(methylaniline)ferrate(ii) in various aqueous electrolytes for supercapacitor application
Source: Royal Society of Chemistry journal article supplement (doi:10.1039/d4nj02023e), 2024-01-01
Supplement: d4nj02023e1.pdf [file d4nj02023e1.pdf]

## Supplementary Material

### **Investigating Electrochemical Behavior of Cobalt Pentacyano(methylaniline)ferrate(II) in Various Aqueous Electrolytes for Supercapacitor Application**

Muhammad Bilal,<sup>a</sup> Abid Inayat\*,<sup>a</sup> Saqib Ali,<sup>a,b</sup> Muhammad Adil Mansoor,<sup>c</sup> Ali Haider\*,<sup>a,b</sup> Khizar Hayat,<sup>a</sup> Hazrat Hussain,<sup>a</sup> Talha Nisar,<sup>d</sup> Veit Wagner,<sup>d</sup> Syed Mustansar Abbas<sup>e</sup>

<sup>a</sup>Department of Chemistry, Quaid-i-Azam University, Islamabad, 45320, Pakistan

<sup>b</sup>Pakistan Academy of Sciences, 3-Constitution Avenue, Sector G-5/2, Islamabad 44000, Pakistan

<sup>c</sup>Department of Chemistry, School of Natural Sciences (SNS), National University of Sciences and Technology (NUST), H-12, Islamabad 44000, Pakistan

<sup>d</sup>School of Science, Constructor University, Campus ring 1, 28759, Bremen, Germany

<sup>e</sup>Nanoscience and Technology Department, National Centre for Physics, Quaid-i-Azam University Campus, 45320- Islamabad, Pakistan

Corresponding authors: A.I ([abidinayyat@gmail.com](mailto:abidinayyat@gmail.com)) ; A.H ([ahaider@qau.edu.pk](mailto:ahaider@qau.edu.pk))

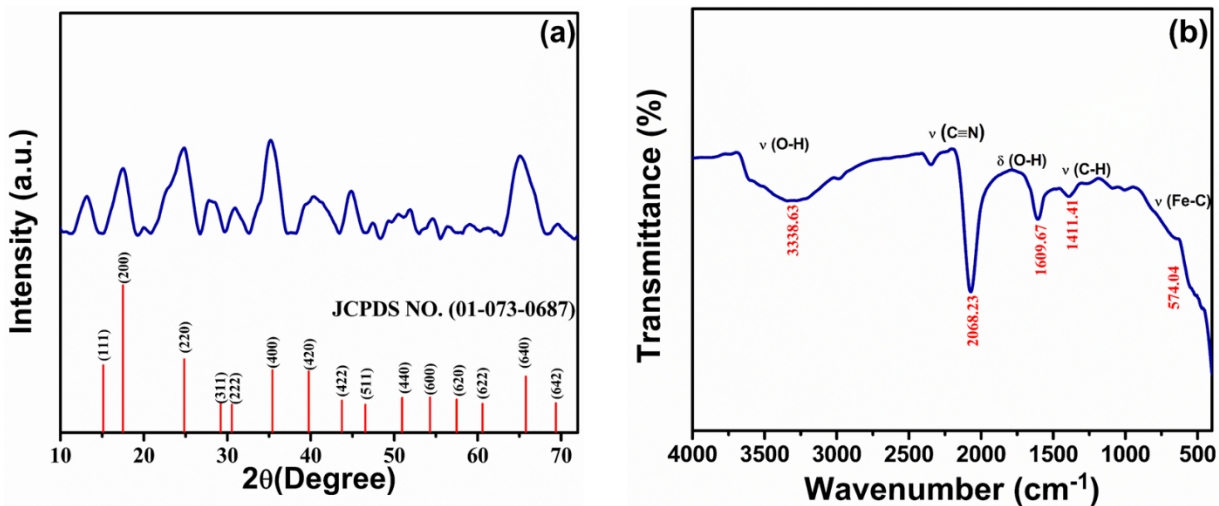

Fig. S1. (a) PXRD pattern and (b) FTIR spectrum of CoPCF.

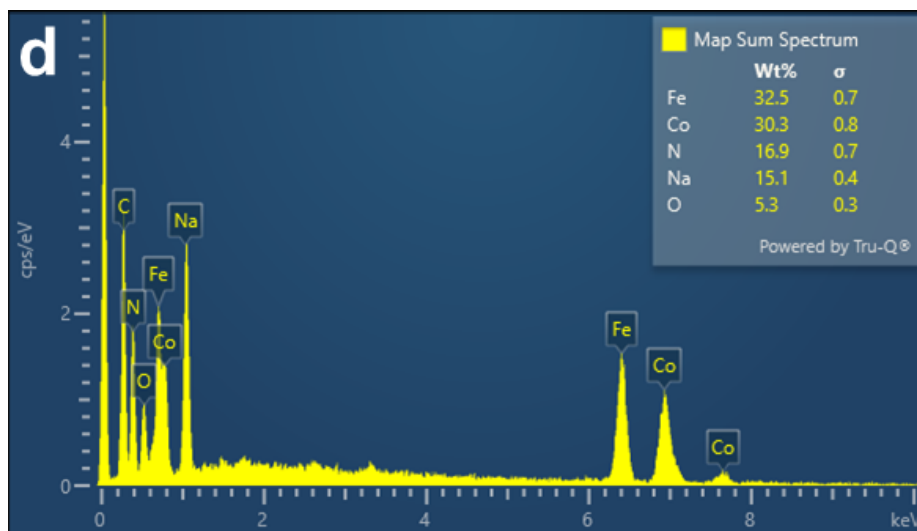

Fig. S2. EDX spectrum of CoPCF.

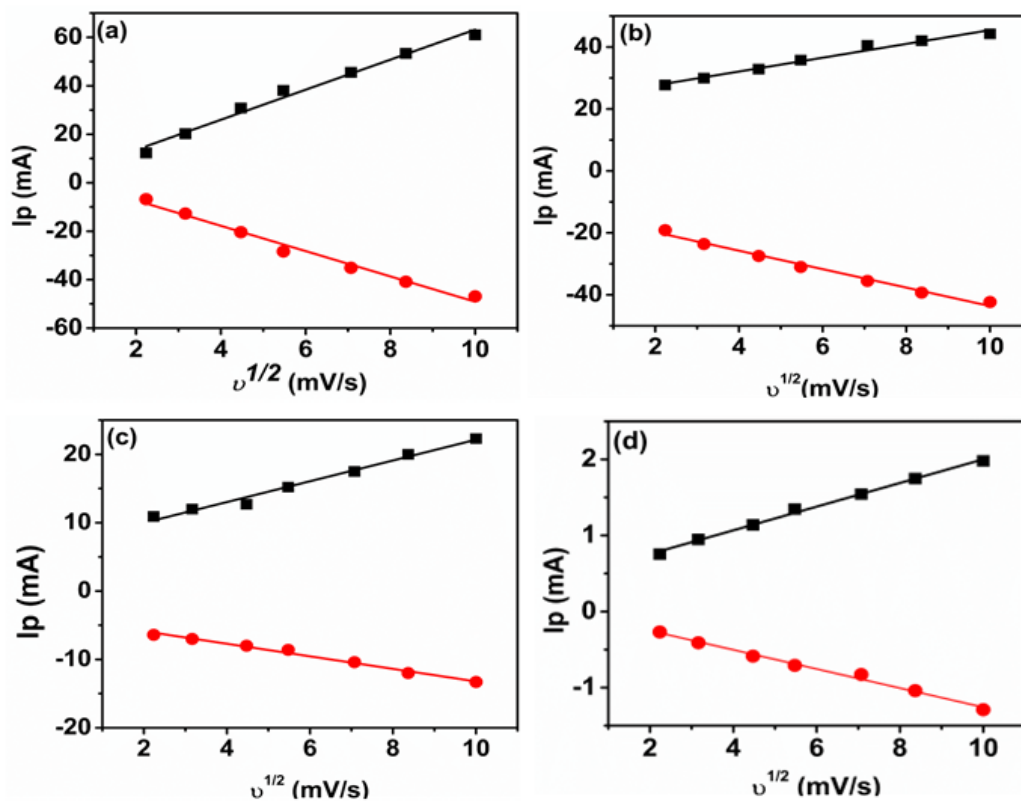

Fig. S3. Relationship between peak current and square root of scan rate in different aqueous electrolytes (a) 3M KOH (b) 1M NaOH (c) 1M LiOH (d) 1M KNO<sub>3</sub>

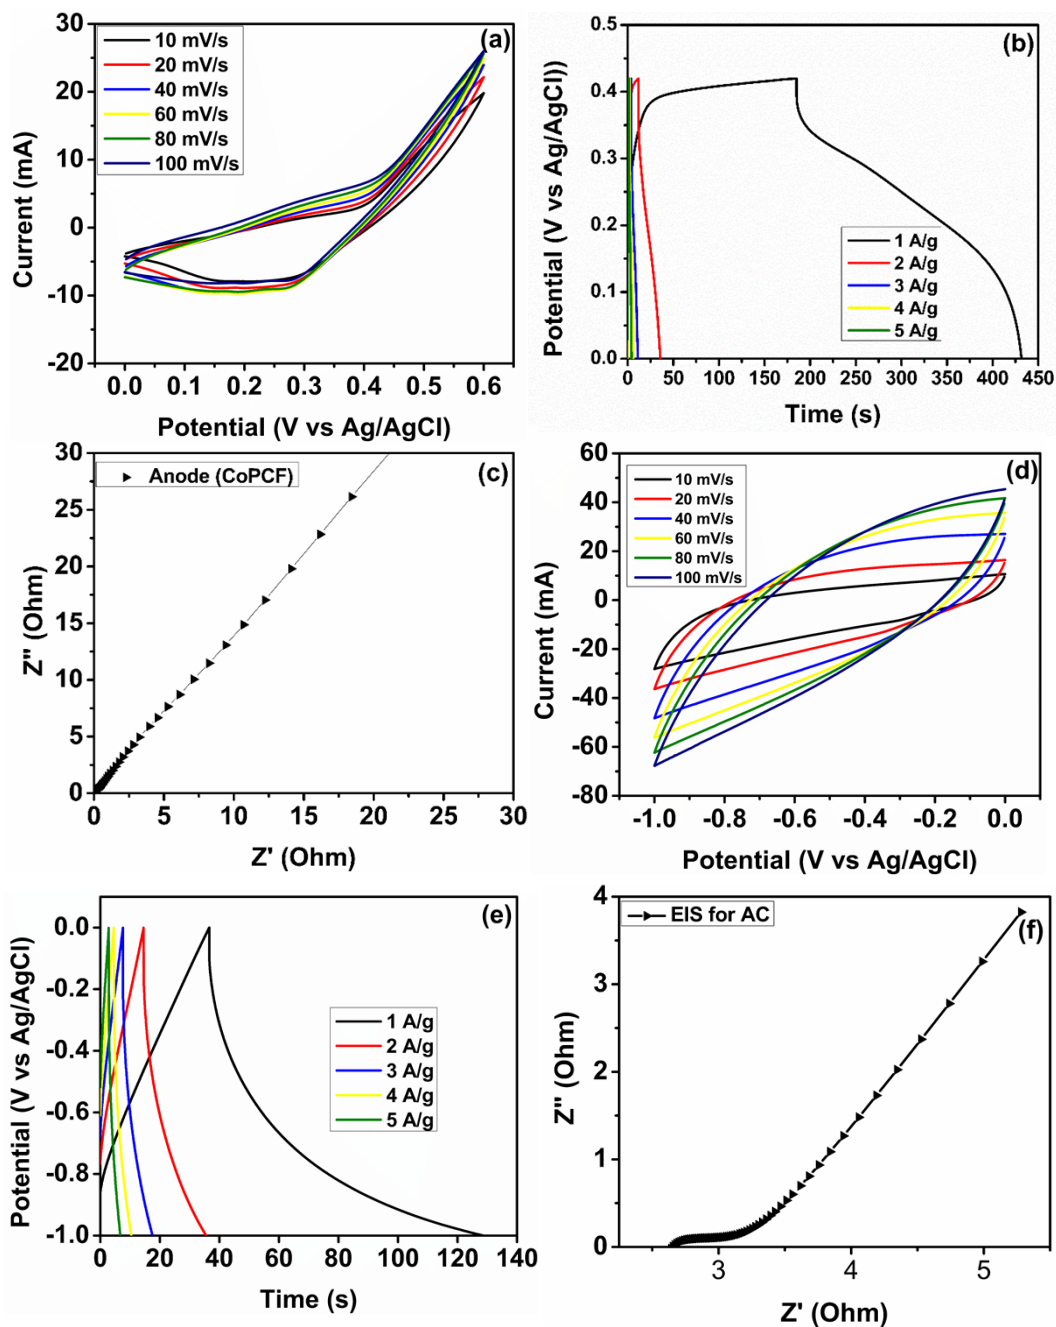

Fig. S4: (a) CV profile at different scan rates (b) GCD profile at different current densities and (c) EIS analysis of CoPCF, (d) CV profile at different scan rates (e) GCD profile at different current densities and (f) EIS analysis of AC device.

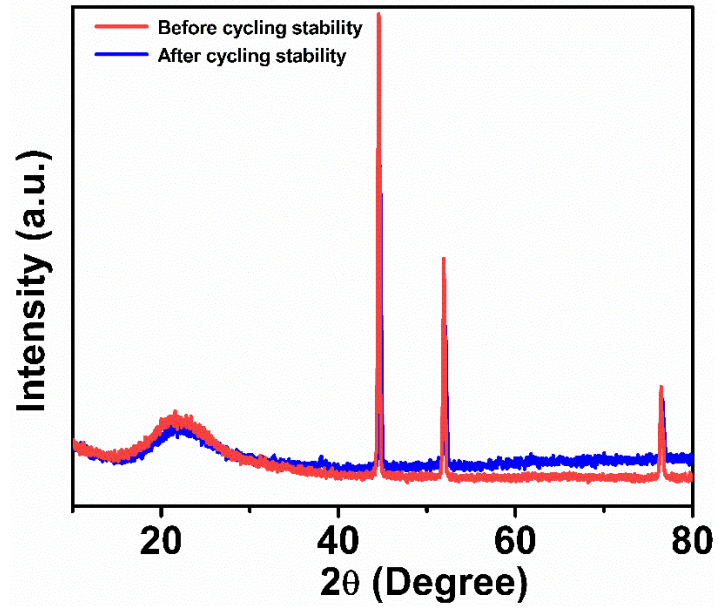

Fig. S5. PXR analysis before and after cycling.

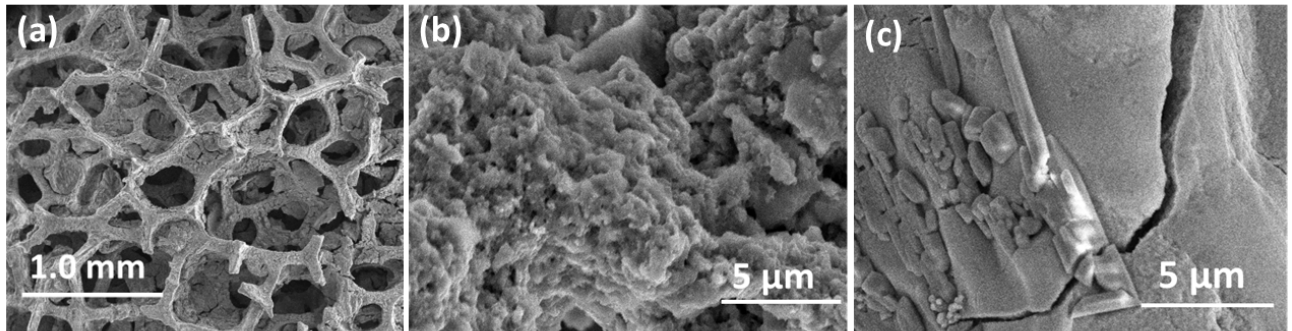

Fig. S6. SEM analysis before and after cycling (a) PABs deposited in NiF (b) SEM image before cycling (c) SEM images after cycling.
